# Supplementary material
Source: PubMed Central journal article supplement (PMC4457377)
Supplement: NIHMS691311-supplement-Table.pdf [file NIHMS691311-supplement-Table.pdf]

Supplementary information S1 (table) | Resistance profiles for uropathogens

| Uropathogen                                      | Antibiotic resistance range | Genotype                               | Resistance Provided                                                                   | Alternative treatments for resistant strains                                                             |                                                                                                                                                                |
|--------------------------------------------------|-----------------------------|----------------------------------------|---------------------------------------------------------------------------------------|----------------------------------------------------------------------------------------------------------|----------------------------------------------------------------------------------------------------------------------------------------------------------------|
|                                                  |                             |                                        |                                                                                       | Antibiotic Therapies                                                                                     | Combination Therapies                                                                                                                                          |
| <b>Gram negative</b>                             |                             |                                        |                                                                                       |                                                                                                          |                                                                                                                                                                |
| <i>E. coli</i> <sup>1-4</sup>                    | MDR                         | ESBL (CTX-M)                           | Penicillin, cephamycin, cephalosporin,                                                | Fosfomycin, nitrofurantoin, fluoroquinolones cefepime, ertapenem, aminoglycosides                        | <u>Antibiotics+ inhibitor:</u> ceftolozane/tazobactam                                                                                                          |
| <i>Klebsiella spp</i> <sup>1-5</sup>             | MDR                         | ESBL, KPC, Qnr                         | Penicillin, cephamycin, cephalosporin, carbapenem, nitrofurantoin, quinolone          | Fosfomycin, polymyxin B, fluoroquinolones, tigecycline aminoglycosides, ertapenem, cefepime, tigecycline | <u>Antibiotic+ inhibitor:</u> Piperacillin/Avibactam<br><u>Antibiotic+ inhibitor:</u> ceftoxime/Avibactam<br><u>Antibiotic+ inhibitor:</u> cefepime/Avibactam  |
| <i>Proteus spp</i> <sup>1</sup>                  | Resistant                   |                                        | Nitrofurantoin, methicillin                                                           | Fosfomycin                                                                                               |                                                                                                                                                                |
| <i>Pseudomonas spp</i> <sup>1</sup>              | MDR                         | ESBL (OXA), CRE, AmpC, efflux pumps    | Penicillin, cephamycin, third generation- cephalosporin, carbapenem, nitrofurantoin   | aminoglycosides                                                                                          | <u>Antibiotics+ inhibitor:</u> ceftolozane/tazobactam<br><u>Antibiotics+ inhibitor:</u> BAL30072/BAL2988/ clavulanate<br><u>Antibiotics:</u> colitsin/amikacin |
| <b>Gram positive</b>                             |                             |                                        |                                                                                       |                                                                                                          |                                                                                                                                                                |
| <i>Enterococcus spp</i> <sup>2,4,5</sup>         | MDR                         | Van genes, β-lactamases, PBP mutations | Cephalosporins, penicillin, trimethoprim, clindamycin, aminoglycosides, glycopeptides | Nitrofurantoin, fosfomycin, fluoroquinolones linezolid, daptomycin, tigecycline                          | <u>Antibiotics:</u> ampicillin/ aminoglycosides                                                                                                                |
| <i>Staphylococcus saprophyticus</i> <sup>2</sup> | Susceptible                 |                                        |                                                                                       | Trimethoprim-sulfamethoxazole, ciprofloxacin                                                             |                                                                                                                                                                |

- 1 Garau, J. Other antimicrobials of interest in the era of extended-spectrum beta-lactamases: fosfomycin, nitrofurantoin and tigecycline. *Clinical Microbiology and Infection* **14**, 198-202, doi:DOI 10.1111/j.1469-0691.2007.01852.x (2008).
- 2 Gupta, K. & Bhadelia, N. Management of urinary tract infections from multidrug-resistant organisms. *Infect Dis Clin North Am* **28**, 49-59, doi:10.1016/j.idc.2013.10.002 (2014).
- 3 Paterson, D. L. Resistance in gram-negative bacteria: Enterobacteriaceae. *American journal of infection control* **34**, S20-28; discussion S64-73, doi:10.1016/j.ajic.2006.05.238 (2006).
- 4 Chen, Y. H., Ko, W. C. & Hsueh, P. R. Emerging resistance problems and future perspectives in pharmacotherapy for complicated urinary tract infections. *Expert opinion on pharmacotherapy* **14**, 587-596, doi:10.1517/14656566.2013.778827 (2013).
- 5 Pendleton, J. N., Gorman, S. P. & Gilmore, B. F. Clinical relevance of the ESKAPE pathogens. *Expert review of anti-infective therapy* **11**, 297-308, doi:10.1586/eri.13.12 (2013).
